# Supplementary material
Source: publisher figshare collection journal article supplement (https://karger.figshare.com/articles/dataset/_/5122987)
Supplement: Supplementary file 1 [file 1]

Archive with 4 entries (4 files):
- 000333850_sm_Figures.jpg
- 000333850_sm_Legends.doc
- 000333850_sm_Suppl._ Material.doc
- 000333850_sm_Suppl._Material.pdf
